# Supplementary material
Source: PubMed Central journal article supplement (PMC218722)

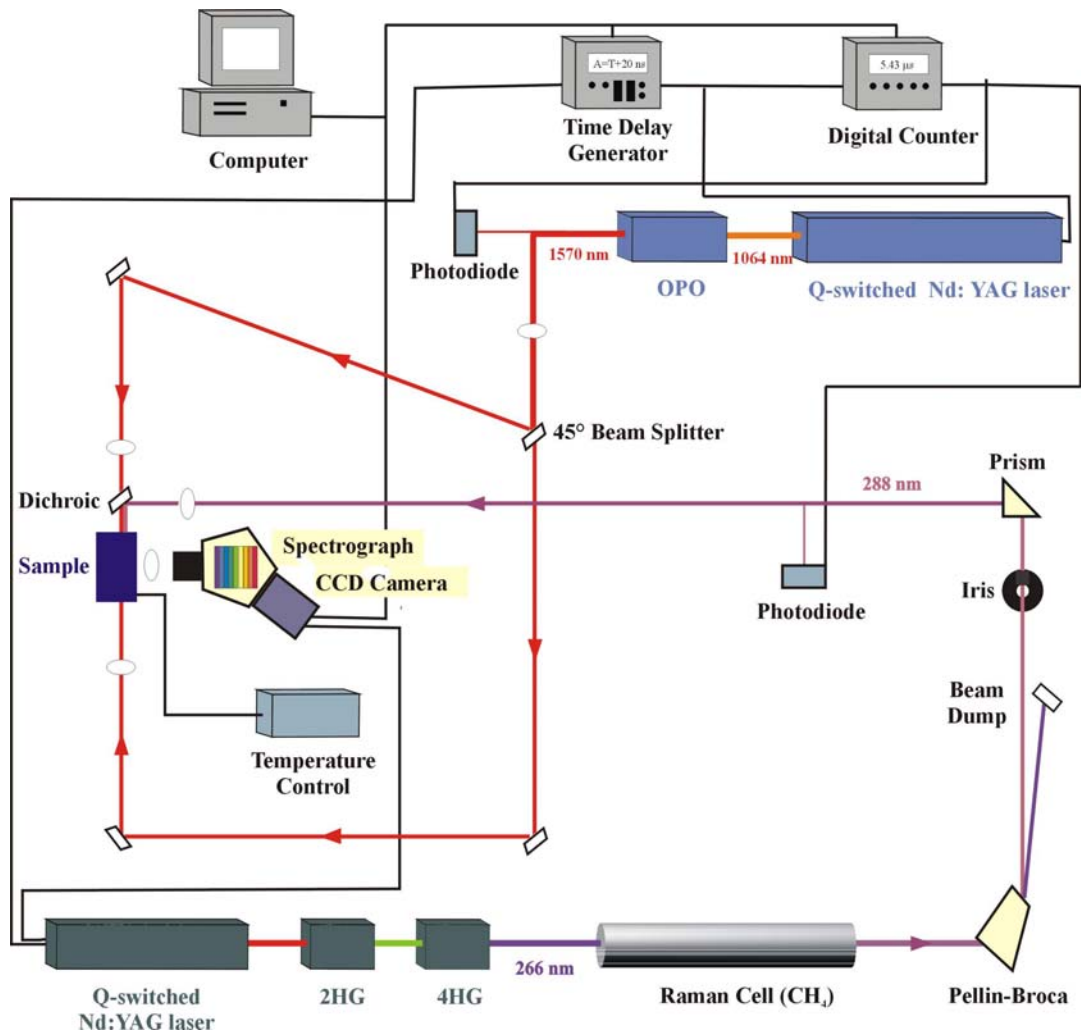

Supplement: pnas_2033863100_3.pdf [file pnas_2033863100_3.pdf]

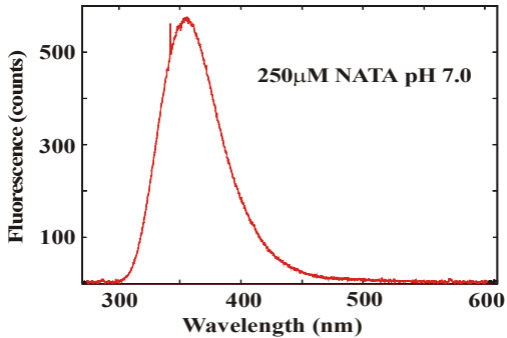

Supplement: pnas_2033863100_5.pdf [file pnas_2033863100_5.pdf]

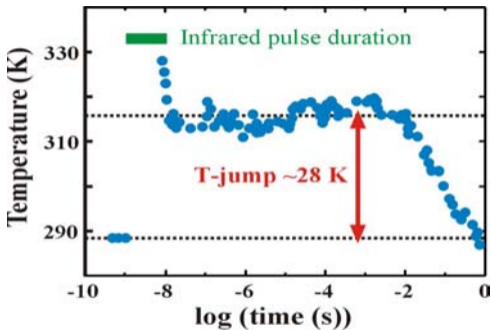

Supplement: pnas_2033863100_7.pdf [file pnas_2033863100_7.pdf]
